# Supplementary material
Source: ML conference proceedings conference paper supplement (https://openaccess.thecvf.com/content/CVPR2024/html/Fan_DiverGen_Improving_Instance_CVPR_2024_paper.html)
Supplement: Supplementary file 1 [file Fan_DiverGen_Improving_Instance_CVPR_2024_supplemental.pdf]

# DiverGen: Improving Instance Segmentation by Learning Wider Data Distribution with More Diverse Generative Data

## Supplementary Material

### A. Implementation Details

#### A.1. Data Distribution Analysis

We use the image encoder of CLIP [7] ViT-L/14 to extract image embeddings. For objects in the LVIS [3] dataset, we extract embeddings from the object regions instead of the whole images. First, we blur the regions outside the object masks using the normalized box filter, with the kernel size of (10, 10). Then, to prevent objects from being too small, we pad around the object boxes to ensure the minimum width of the padded boxes is 80 pixels, and crop the images according to the padded boxes. Finally, the cropped images are fed into the CLIP image encoder to extract embeddings. For generative images, the whole images are fed into the CLIP image encoder to extract embeddings. At last, we use UMAP [5] to reduce dimensions for visualization.  $\tau$  is set to 0.9 in the energy function.

To investigate the potential impact of noise in the rare classes to TVG metrics, we conduct additional experiments to demonstrate the validity of TVG. We randomly take five different models each for the LVIS and LVIS + Gen data sources, compute the mean ( $\mu$ ) and standard deviation ( $\sigma$ ) of their TVG, and calculate the 3 sigma range ( $\mu + 3\sigma$  and  $\mu - 3\sigma$ ), which we think represents the maximum fluctuation that potential noise could induce. As shown in Table 1, we find that: 1) The TVGs of LVIS all exceed the 3 sigma upper bound of LVIS + Gen, while the TVGs of LVIS + Gen are all below the 3 sigma lower bound of LVIS, and there is no overlap between the 3 sigma ranges of LVIS and LVIS + Gen; 2) For both LVIS + Gen and LVIS, there is no overlap between the 3 sigma ranges of different groups, e.g. frequent and common, common and rare. These two findings suggest that even in the presence of potential noise, the results can not be attributed to those fluctuations. Therefore, we think our proposed TVG metrics are reasonable and can support the conclusions.

#### A.2. Category Diversity

We compute the path similarity of WordNet [2] synsets between 1,000 categories in ImageNet-1K [9] and 1,203 categories in LVIS [3]. For each of the 1,000 categories in ImageNet-1K, if the highest similarity for that category is below 0.4, we consider the category to be non-existent in LVIS and designate it as an extra category. Based on this method, 566 categories can serve as extra categories. The names of these 566 categories are presented in Table 4.

|                 | TVG <sub>f</sub> <sup>box</sup> | TVG <sub>f</sub> <sup>mask</sup> | TVG <sub>c</sub> <sup>box</sup> | TVG <sub>c</sub> <sup>mask</sup> | TVG <sub>r</sub> <sup>box</sup> | TVG <sub>r</sub> <sup>mask</sup> |
|-----------------|---------------------------------|----------------------------------|---------------------------------|----------------------------------|---------------------------------|----------------------------------|
| $\mu$           | 9.98                            | 8.60                             | 16.59                           | 13.36                            | 30.23                           | 24.22                            |
| $\sigma$        | 0.24                            | 0.18                             | 0.56                            | 0.44                             | 1.12                            | 1.18                             |
| $\mu + 3\sigma$ | 10.70                           | 9.15                             | 18.26                           | 14.69                            | 33.58                           | 27.77                            |
| $\mu - 3\sigma$ | 9.25                            | 8.06                             | 14.91                           | 12.04                            | 26.88                           | 20.68                            |
| LVIS            | 13.16                           | 10.71                            | 21.80                           | 16.80                            | 39.59                           | 31.68                            |

(a) LVIS + Gen

|                 | TVG <sub>f</sub> <sup>box</sup> | TVG <sub>f</sub> <sup>mask</sup> | TVG <sub>c</sub> <sup>box</sup> | TVG <sub>c</sub> <sup>mask</sup> | TVG <sub>r</sub> <sup>box</sup> | TVG <sub>r</sub> <sup>mask</sup> |
|-----------------|---------------------------------|----------------------------------|---------------------------------|----------------------------------|---------------------------------|----------------------------------|
| $\mu$           | 13.95                           | 11.40                            | 22.53                           | 17.16                            | 43.46                           | 35.10                            |
| $\sigma$        | 0.41                            | 0.35                             | 0.43                            | 0.33                             | 1.98                            | 1.75                             |
| $\mu + 3\sigma$ | 15.17                           | 12.45                            | 23.81                           | 18.14                            | 49.39                           | 40.37                            |
| $\mu - 3\sigma$ | 12.73                           | 10.34                            | 21.25                           | 16.17                            | 37.53                           | 29.84                            |
| LVIS + Gen      | 9.64                            | 8.38                             | 15.64                           | 12.69                            | 29.39                           | 22.49                            |

(b) LVIS

Table 1. Statistics of train-val gap on different data sources.

#### A.3. Prompt Diversity

Limited by the inference cost of ChatGPT, we use the manually designed prompts as the base and only use ChatGPT to enhance the prompt diversity for a subset of categories. For manually designed prompts, the template of prompts is “a photo of a single {category\_name}, {category\_def}, in a white background”. category\_name and category\_def are from LVIS [3] category information. For ChatGPT designed prompts, we select a subset of categories and use ChatGPT to enhance prompt diversity for these categories. The names of the 144 categories in this subset are shown in Table 5. We use GPT-3.5-turbo and have three requirements for the ChatGPT: 1) each prompt should be as different as possible; 2) each prompt should ensure that there is only one object in the image; 3) prompts should describe different attributes of the category. Therefore, the input prompts to ChatGPT contain these three requirements. Examples of input prompts and the corresponding responses from ChatGPT are illustrated in Figure 3. To conserve output token length, there is no strict requirement for ChatGPT designed prompts to end with “in a white background”, and this constraint will be added when generating images.

#### A.4. Generative Model Diversity

We select two commonly used generative models, Stable Diffusion [8] and DeepFloyd-IF [10]. For Stable Diffusion, we use Stable Diffusion V1.5, with 50 inference steps and a guidance scale of 7.5. All other parameters are set to their defaults. For DeepFloyd-IF, we use the output images from stage II, with stage I using the weight IF-I-XL-v1.0 and stage II using IF-II-L-v1.0. All parameters are set to their defaults.

### A.5. Instance Annotation

We employ SAM [4] ViT-H as the annotation model. We explore two annotation strategies, namely SAM-foreground and SAM-background. SAM-foreground uses points sampled from foreground objects as input prompts. Specifically, we first obtain the approximate region of the foreground object based on the cross-attention map of the generative model using a threshold. Then, we use k-means++ [1] clustering to transform dense points within the foreground region into cluster centers. Next, we randomly select some points from the cluster centers as inputs to SAM. We use various metrics to evaluate the quality of the output mask and select the mask with the highest score as the final mask. However, although SAM-foreground is intuitive, it also has some limitations. Firstly, cross-attention maps of different categories require different thresholds to obtain foreground regions, making it cumbersome to choose the optimal threshold for each category. Secondly, the number of points required for SAM to output mask varies for different foreground objects. Complex object needs more points than simple object, making it challenging to control the number of points. Additionally, the position of points significantly influences the quality of SAM’s output mask. If the position of points is not appropriate, this strategy is prone to generating incomplete masks.

Therefore, we discard SAM-foreground and propose a simpler and more effective annotation strategy, SAM-background. Due to our leveraging of the controllability of the generative model in instance generation, the generative images have two characteristics: 1) each image predominantly contains only one foreground object; 2) the background of the images is relatively simple. SAM-background directly uses the four corner points of the image as input prompts for SAM to obtain the background mask, then inverts the background mask as the mask of the foreground object. The illustrations of point selection for SAM-foreground and SAM-background are shown in Figure 1. By using SAM-background for annotation, more refined masks can be obtained. Examples of annotations from SAM-foreground and SAM-background are shown in Figure 2.

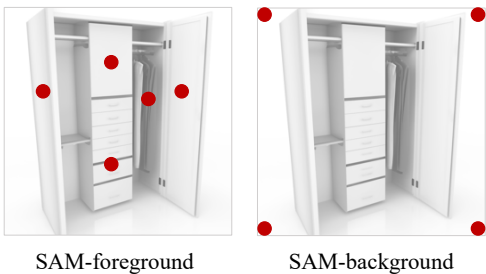

Figure 1. Illustrations of point selection for SAM-foreground and SAM-background.

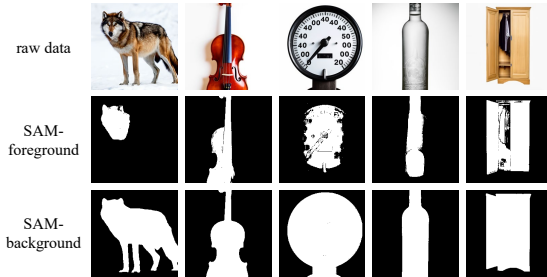

Figure 2. Examples of annotations from SAM-foreground and SAM-background. By using SAM-background for annotation, more refined masks can be obtained.

To further validate the effectiveness of SAM-background, we manually annotate masks for some images as ground truth (gt). We apply both strategies to annotate these images and calculate the mIoU between the resulting masks and the ground truth. The results in Table 2 indicate that SAM-background achieves better annotation quality.

| Strategy       | mIoU          |
|----------------|---------------|
| SAM-foreground | 0.8163        |
| SAM-background | <b>0.9418</b> |

Table 2. Results of SAM-foreground and SAM-background. SAM-background achieves better annotation quality.

### A.6. Instance Filtration

We use the image encoder of CLIP [7] ViT-L/14 to extract image embeddings. The embedding extraction process is consistent with Sec A.1. Then we calculate the cosine similarity between embeddings of objects in LVIS training set and embeddings of generative images. For each generative image, the final CLIP inter-similarity is the average similarity with all objects of the same category in the training set. Through experiments, we find that when the filtering threshold is 0.6, the model achieves the best performance and strikes a balance between data diversity and quality, so we set the threshold to 0.6.

Furthermore, we also explore other filtration strategies. From our experiments, using pure image-trained models like DINOv2 [6] as image encoder or combining CLIP score and CLIP inter-similarity is not as good as using just CLIP inter-similarity alone, as shown in Table 3. Therefore, we ultimately opt to only use CLIP inter-similarity.

| Strategy                           | $AP^{box}$   | $AP^{mask}$  | $AP_r^{box}$ | $AP_r^{mask}$ |
|------------------------------------|--------------|--------------|--------------|---------------|
| DINOv2                             | 48.02        | 42.39        | 40.31        | 35.27         |
| CLIP score + CLIP inter-similarity | 49.82        | 44.30        | 45.26        | 40.92         |
| CLIP inter-similarity              | <b>50.07</b> | <b>44.44</b> | <b>45.53</b> | <b>41.16</b>  |

Table 3. Results of different filtration strategies.

## A.7. Instance Augmentation

In instance augmentation, we use the instance paste strategy proposed by Zhao et al. [11] to increase model learning efficiency on generative data. Each image contains up to 20 pasted instances at most.

The parameters not specified in the paper are consistent with X-Paste [11].

## B. Visualization

### B.1. Prompt Diversity

We find that images generated from ChatGPT designed prompts have diverse textures, styles, patterns, etc., greatly enhancing data diversity. The ChatGPT designed prompts and the corresponding generative images are shown in Figure 4. Compared to manually designed prompts, the diversity of images generated from ChatGPT designed prompts can be significantly improved. A visual comparison between generative images from manually designed prompts and ChatGPT designed prompts is shown in Figure 5.

### B.2. Generative Model Diversity

The images generated by Stable Diffusion and DeepFloyd-IF are different, even within the same category, significantly enhancing the data diversity. Both Stable Diffusion and DeepFloyd-IF are capable of producing images belonging to the target categories. However, the images generated by DeepFloyd-IF appear more photorealistic and consistent with the prompt texts. This indicates DeepFloyd-IF's superiority in image generation quality and controllability through text prompts. Examples from Stable Diffusion and DeepFloyd-IF are shown in Figure 6 and Figure 7, respectively.

### B.3. Instance Annotation

In terms of annotation quality, masks generated by max CLIP [11] tend to be incomplete, while our proposed SAM-bg is able to produce more refined and complete masks when processing images of multiple categories. As shown in Figure 8, our proposed annotation strategy can output more precise and refined masks compared to max CLIP.

### B.4. Instance Augmentation

The use of instance augmentation strategies helps alleviate the limitation in relatively simple scenes of generative data and improves the efficiency of model learning on the generative data. Examples of augmented data are shown in Figure 9.

## References

- [1] David Arthur and Sergei Vassilvitskii. K-means++ the advantages of careful seeding. In *Proc. Annual ACM-SIAM*

- Symposium on Discrete algorithms*, pages 1027–1035, 2007. 2
- [2] Christiane Fellbaum. Wordnet. In *Theory and applications of ontology: computer applications*, pages 231–243. Springer, 2010. 1
- [3] Agrim Gupta, Piotr Dollar, and Ross Girshick. Lvis: A dataset for large vocabulary instance segmentation. In *Proc. IEEE Conf. Comp. Vis. Patt. Recogn.*, pages 5356–5364, 2019. 1
- [4] Alexander Kirillov, Eric Mintun, Nikhila Ravi, Hanzi Mao, Chloe Rolland, Laura Gustafson, Tete Xiao, Spencer Whitehead, Alexander Berg, Wan-Yen Lo, et al. Segment anything. In *Proc. IEEE Int. Conf. Comp. Vis.*, pages 4015–4026, 2023. 2
- [5] Leland McInnes, John Healy, and James Melville. Umap: Uniform manifold approximation and projection for dimension reduction. *arXiv: Comp. Res. Repository*, 2018. 1
- [6] Maxime Oquab, Timothée Darcet, Théo Moutakanni, Huy Vo, Marc Szafraniec, Vasil Khalidov, Pierre Fernandez, Daniel Haziza, Francisco Massa, Alaaeldin El-Nouby, et al. Dinov2: Learning robust visual features without supervision. *Trans. Mach. Learn. Research*, 2023. 2
- [7] Alec Radford, Jong Wook Kim, Chris Hallacy, Aditya Ramesh, Gabriel Goh, Sandhini Agarwal, Girish Sastry, Amanda Askell, Pamela Mishkin, Jack Clark, et al. Learning transferable visual models from natural language supervision. In *Proc. Int. Conf. Mach. Learn.*, pages 8748–8763. PMLR, 2021. 1, 2
- [8] Robin Rombach, Andreas Blattmann, Dominik Lorenz, Patrick Esser, and Björn Ommer. High-resolution image synthesis with latent diffusion models. In *Proc. IEEE Conf. Comp. Vis. Patt. Recogn.*, pages 10684–10695, 2022. 1
- [9] Olga Russakovsky, Jia Deng, Hao Su, Jonathan Krause, Sanjeev Satheesh, Sean Ma, Zhiheng Huang, Andrej Karpathy, Aditya Khosla, Michael Bernstein, et al. Imagenet large scale visual recognition challenge. *Int. J. Comput. Vision*, 115: 211–252, 2015. 1
- [10] Alex Shonenkov, Misha Konstantinov, Daria Bakshandaeva, Christoph Schuhmann, Ksenia Ivanova, and Nadiia Klokova. Deepfloyd-if, 2023. 1
- [11] Hanqing Zhao, Dianmo Sheng, Jianmin Bao, Dongdong Chen, Dong Chen, Fang Wen, Lu Yuan, Ce Liu, Wenbo Zhou, Qi Chu, Weiming Zhang, and Nenghai Yu. X-paste: Revisiting scalable copy-paste for instance segmentation using CLIP and stablediffusion. *Proc. Int. Conf. Mach. Learn.*, 2023. 3

|                                  |                             |                                |                          |
|----------------------------------|-----------------------------|--------------------------------|--------------------------|
| tench                            | great_white_shark           | tiger_shark                    | electric_ray             |
| stingray                         | brambling                   | goldfinch                      | house_finch              |
| junco                            | indigo_bunting              | American_robin                 | bulbul                   |
| jay                              | magpie                      | chickadee                      | American_dipper          |
| kite_(bird_of_prey)              | fire_salamander             | smooth_newt                    | newt                     |
| spotted_salamander               | axolotl                     | American_bullfrog              | loggerhead_sea_turtle    |
| leatherback_sea_turtle           | banded_gecko                | green_iguana                   | Carolina_anole           |
| desert_grassland_whiptail_lizard | agama                       | frilled-necked_lizard          | alligator_lizard         |
| Gila_monster                     | European_green_lizard       | chameleon                      | Komodo_dragon            |
| Nile_crocodile                   | triceratops                 | worm_snake                     | ring-necked_snake        |
| eastern_hog-nosed_snake          | smooth_green_snake          | kingsnake                      | garter_snake             |
| water_snake                      | vine_snake                  | night_snake                    | boa_constrictor          |
| African_rock_python              | Indian_cobra                | green_mamba                    | Saharan_horned_viper     |
| eastern_diamondback_rattlesnake  | sidewinder_rattlesnake      | trilobite                      | harvestman               |
| scorpion                         | tick                        | centipede                      | black_grouse             |
| ptarmigan                        | ruffed_grouse               | prairie_grouse                 | peafowl                  |
| quail                            | partridge                   | sulphur-crested_cockatoo       | lorikeet                 |
| coucal                           | bee_eater                   | hornbill                       | jacamar                  |
| toucan                           | red-breasted_merganser      | black_swan                     | tusker                   |
| echidna                          | platypus                    | wallaby                        | wombat                   |
| jellyfish                        | sea_anemone                 | brain_coral                    | flatworm                 |
| nematode                         | conch                       | snail                          | slug                     |
| sea_slug                         | chiton                      | chambered_nautilus             | American_lobster         |
| crayfish                         | hermit_crab                 | isopod                         | white_stork              |
| black_stork                      | spoonbill                   | great_egret                    | crane_bird               |
| limpkin                          | common_gallinule            | American_coot                  | bustard                  |
| ruddy_turnstone                  | dunlin                      | common_redshank                | dowitcher                |
| oystercatcher                    | albatross                   | grey_whale                     | dugong                   |
| sea_lion                         | Chihuahua                   | Japanese_Chin                  | Maltese                  |
| Pekingese                        | Shih_Tzu                    | King_Charles_Spaniel           | Papillon                 |
| toy_terrier                      | Rhodesian_Ridgeback         | Afghan_Hound                   | Basset_Hound             |
| Beagle                           | Bloodhound                  | Bluetick_Coonhound             | Black_and_Tan_Coonhound  |
| Treeing_Walker_Coonhound         | English_foxhound            | Redbone_Coonhound              | borzoi                   |
| Irish_Wolfhound                  | Italian_Greyhound           | Whippet                        | Ibizan_Hound             |
| Norwegian_Elkhound               | Otterhound                  | Saluki                         | Scottish_Deerhound       |
| Weimaraner                       | Staffordshire_Bull_Terrier  | American_Staffordshire_Terrier | Bedlington_Terrier       |
| Border_Terrier                   | Kerry_Blue_Terrier          | Irish_Terrier                  | Norfolk_Terrier          |
| Norwich_Terrier                  | Yorkshire_Terrier           | Wire_Fox_Terrier               | Lakeland_Terrier         |
| Sealyham_Terrier                 | Airedale_Terrier            | Cairn_Terrier                  | Australian_Terrier       |
| Dandie_Dinmont_Terrier           | Boston_Terrier              | Miniature_Schnauzer            | Giant_Schnauzer          |
| Standard_Schnauzer               | Scottish_Terrier            | Tibetan_Terrier                | Australian_Silky_Terrier |
| Soft-coated_Wheaten_Terrier      | West_Highland_White_Terrier | Lhasa_Apso                     | Flat-Coated_Retriever    |
| Curly-coated_Retriever           | Golden_Retriever            | Labrador_Retriever             | Chesapeake_Bay_Retriever |
| German_Shorthaired_Pointer       | Vizsla                      | English_Setter                 | Irish_Setter             |
| Gordon_Setter                    | Brittany_dog                | Clumber_Spaniel                | English_Springer_Spaniel |
| Welsh_Springer_Spaniel           | Cocker_Spaniel              | Sussex_Spaniel                 | Irish_Water_Spaniel      |
| Kuvasz                           | Schipperke                  | Groenendael_dog                | Malinois                 |
| Dobermann                        | Miniature_Pinscher          | Greater_Swiss_Mountain_Dog     | Bernese_Mountain_Dog     |
| Appenzeller_Sennenhund           | Entlebucher_Sennenhund      | Boxer                          | Bullmastiff              |
| Tibetan_Mastiff                  | Great_Dane                  | St._Bernard                    | husky                    |
| Alaskan_Malamute                 | Siberian_Husky              | Affenpinscher                  | Samoyed                  |
| Pomeranian                       | Chow_Chow                   | Keeshond                       | brussels_griffon         |
| Pembroke_Welsh_Corgi             | Cardigan_Welsh_Corgi        | Toy_Poodle                     | Miniature_Poodle         |
| Standard_Poodle                  | dingo                       | dhole                          | African_wild_dog         |
| hyena                            | red_fox                     | kit_fox                        | Arctic_fox               |
| grey_fox                         | tabby_cat                   | tiger_cat                      | Persian_cat              |
| Siamese_cat                      | Egyptian_Mau                | lynx                           | leopard                  |
| snow_leopard                     | jaguar                      | cheetah                        | mongoose                 |

|                              |                     |                          |                        |
|------------------------------|---------------------|--------------------------|------------------------|
| meerkat                      | dung_beetle         | rhinoceros_beetle        | fly                    |
| bee                          | ant                 | grasshopper              | cricket_insect         |
| stick_insect                 | praying_mantis      | cicada                   | leafhopper             |
| lacewing                     | damselfly           | red_admiral_butterfly    | monarch_butterfly      |
| small_white_butterfly        | sea_urchin          | sea_cucumber             | hare                   |
| fox_squirrel                 | guinea_pig          | wild_boar                | warthog                |
| ox                           | water_buffalo       | bison                    | bighorn_sheep          |
| Alpine_ibex                  | hartebeest          | impala_(antelope)        | llama                  |
| weasel                       | mink                | black-footed_ferret      | otter                  |
| skunk                        | badger              | armadillo                | three-toed_sloth       |
| orangutan                    | chimpanzee          | gibbon                   | siamang                |
| guenon                       | patas_monkey        | macaque                  | langur                 |
| black-and-white_colobus      | proboscis_monkey    | marmoset                 | white-headed_capuchin  |
| howler_monkey                | titi_monkey         | Geoffroy's_spider_monkey | common_squirrel_monkey |
| ring-tailed_lemur            | indri               | red_panda                | snoek_fish             |
| eel                          | rock_beauty_fish    | clownfish                | sturgeon               |
| gar_fish                     | lionfish            | academic_gown            | accordion              |
| aircraft_carrier             | altar               | apiary                   | assault_rifle          |
| bakery                       | balance_beam        | baluster_or_handrail     | barbershop             |
| barn                         | barometer           | bassinet                 | bassoon                |
| lighthouse                   | bell_tower          | baby_bib                 | boathouse              |
| bookstore                    | breakwater          | breastplate              | butcher_shop           |
| carousel                     | tool_kit            | automated_teller_machine | cassette_player        |
| castle                       | catamaran           | cello                    | chain                  |
| chain-link_fence             | chainsaw            | chiffonier               | Christmas_stocking     |
| church                       | movie_theater       | cliff_dwelling           | cloak                  |
| clogs                        | spiral_or_coil      | candy_store              | cradle                 |
| construction_crane           | croquet_ball        | cuirass                  | dam                    |
| desktop_computer             | disc_brake          | dock                     | dome                   |
| drilling_rig                 | electric_locomotive | entertainment_center     | face_powder            |
| fire_screen                  | flute               | fountain                 | French_horn            |
| gas_pump                     | golf_ball           | gong                     | greenhouse             |
| radiator_grille              | grocery_store       | guillotine               | hair_spray             |
| half-track                   | hand-held_computer  | hard_disk_drive          | harmonica              |
| harp                         | combine_harvester   | holster                  | home_theater           |
| honeycomb                    | hook                | gymnastic_horizontal_bar | jigsaw_puzzle          |
| knot                         | lens_cap            | library                  | lifeboat               |
| lighter                      | lipstick            | lotion                   | loupe_magnifying_glass |
| sawmill                      | messenger_bag       | maraca                   | marimba                |
| mask                         | matchstick          | maypole                  | maze                   |
| megalith                     | military_uniform    | missile                  | mobile_home            |
| modem                        | monastery           | monitor                  | moped                  |
| mortar_and_pestle            | mosque              | mosquito_net             | tent                   |
| mousetrap                    | moving_van          | muzzle                   | metal_nail             |
| neck_brace                   | notebook_computer   | obelisk                  | oboe                   |
| ocarina                      | odometer            | oil_filter               | pipe_organ             |
| oscilloscope                 | oxygen_mask         | palace                   | pan_flute              |
| parallel_bars                | patio               | pedestal                 | photocopier            |
| plectrum                     | Pickelhaube         | picket_fence             | pier                   |
| pirate_ship                  | block_plane         | planetarium              | plastic_bag            |
| plate_rack                   | plunger             | police_van               | prayer_rug             |
| prison                       | hockey_puck         | punching_bag             | purse                  |
| radio                        | radio_telescope     | rain_barrel              | fishing_casting_reel   |
| restaurant                   | rugby_ball          | safe                     | scabbard               |
| schooner                     | CRT_monitor         | seat_belt                | shoe_store             |
| shoji_screen_or_room_divider | balaclava_ski_mask  | slide_rule               | sliding_door           |
| slot_machine                 | snorkel             | keyboard_space_bar       | spatula                |
| motorboat                    | spider_web          | spindle                  | stage                  |

|                    |                     |                           |                           |
|--------------------|---------------------|---------------------------|---------------------------|
| steam_locomotive   | through_arch_bridge | steel_drum                | stethoscope               |
| stone_wall         | tram                | stretcher                 | stupa                     |
| submarine          | sundial             | sunglasses                | sunscreen                 |
| suspension_bridge  | swing               | tape_player               | television                |
| thatched_roof      | threshing_machine   | throne                    | tile_roof                 |
| tobacco_shop       | toilet_seat         | torch                     | totem_pole                |
| toy_store          | trimaran            | triumphal_arch            | trombone                  |
| turnstile          | typewriter_keyboard | vaulted_or_arched_ceiling | velvet_fabric             |
| vestment           | viaduct             | sink                      | whiskey_jug               |
| whistle            | window_screen       | window_shade              | airplane_wing             |
| wool               | split_rail_fence    | shipwreck                 | sailboat                  |
| yurt               | website             | crossword                 | dust_jacket               |
| menu               | plate               | guacamole                 | trifle                    |
| baguette           | cabbage             | broccoli                  | spaghetti_squash          |
| acorn_squash       | butternut_squash    | cardoon                   | mushroom                  |
| Granny_Smith_apple | jackfruit           | cherimoya_(custard_apple) | pomegranate               |
| hay                | carbonara           | chocolate_syrup           | dough                     |
| meatloaf           | pot_pie             | red_wine                  | espresso                  |
| tea_cup            | eggnog              | mountain                  | bubble                    |
| cliff              | coral_reef          | geyser                    | lakeshore                 |
| promontory         | sandbar             | beach                     | valley                    |
| volcano            | baseball_player     | bridegroom                | scuba_diver               |
| rapeseed           | daisy               | yellow_lady's_slipper     | corn                      |
| acorn              | rose_hip            | horse_chestnut_seed       | coral_fungus              |
| gyromitra          | stinkhorn_mushroom  | earth_star_fungus         | hen_of_the_woods_mushroom |
| bolete             | corn_cob            |                           |                           |

Table 4. **Extra categories from ImageNet-1K.**

|                            |                             |                       |               |
|----------------------------|-----------------------------|-----------------------|---------------|
| Bible                      | pirate_flag                 | bookmark              | bow_(weapon)  |
| bubble_gum                 | elevator_car                | chocolate_mousse      | compass       |
| corkboard                  | cougar                      | cream_pitcher         | cylinder      |
| dollar                     | dolphin                     | eyepatch              | fruit_juice   |
| golf_club                  | handcuff                    | hockey_stick          | popsicle      |
| pan_(metal_container)      | pew_(church_bench)          | piggy_bank            | pistol        |
| road_map                   | satchel                     | sawhorse              | shawl         |
| sparkler_(fireworks)       | spider                      | string_cheese         | Tabasco_sauce |
| turtleneck_(clothing)      | violin                      | waffle_iron           | whistle       |
| wind_chime                 | headstall_(for_horses)      | fishing_rod           | coat_hanger   |
| clasp                      | crab_(animal)               | flamingo              | stirrup       |
| machine_gun                | pin_(non_jewelry)           | spear                 | drumstick     |
| cornet                     | bottle_opener               | easel                 | dumbbell      |
| garden_hose                | money                       | saddle_(on_an_animal) | garbage       |
| windshield_wiper           | needle                      | liquor                | bamboo        |
| armor                      | pretzel                     | tongs                 | ski_pole      |
| frog                       | hairpin                     | tripod                | flagpole      |
| hose                       | belt_buckle                 | streetlight           | coleslaw      |
| antenna                    | hook                        | Lego                  | thumbtack     |
| coatrack                   | plow_(farm_equipment)       | vinegar               | strap         |
| poker_(fire_stirring_tool) | cufflink                    | chopstick             | salad         |
| dragonfly                  | musical_instrument          | sharpener             | bat_(animal)  |
| lanyard                    | mat_(gym_equipment)         | gargoyle              | underdrawers  |
| paperback_book             | razorblade                  | earring               | sword         |
| shovel                     | turkey_(food)               | ambulance             | pencil        |
| weathervane                | trampoline                  | applesauce            | jam           |
| ski                        | tray                        | tissue_paper          | lamppost      |
| clipboard                  | router_(computer_equipment) | battery               | lollipop      |
| crayon                     | latch                       | fig_(fruit)           | sunglasses    |
| toothpick                  | business_card               | padlock               | asparagus     |
| shot_glass                 | sled                        | key                   | bolt          |
| pipe                       | steering_wheel              | deck_chair            | green_bean    |
| pouch                      | telephone_pole              | fire_hose             | ladle         |
| pliers                     | hair_curler                 | handle                | screwdriver   |
| dining_table               | cart                        | oar                   | wolf          |
| envelope                   | legume                      | shopping_cart         | trench_coat   |

Table 5. Categories of ChatGPT designed prompts.

## Example of using ChatGPT to design prompts

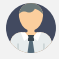

### Human Input:

Please write 20 prompts for stable diffusion to generate images of cream pitcher.  
Each prompt needs to be different, the focus of the description should be the different attributes of the category, such as if the category is animal, the prompts should describe the animal's color, size, age, species, etc., if it is food, the prompts should describe the color of food, brand, size, freshness, packaging type, packaging color, etc.  
Each prompt should ensure that there is only one entity in the generated image. The prompt should start with words like "a photo of ", "a real photo of", "an image of ", "a photography of ", "an illustration of ", etc.  
The output result should not contain anything else, just a prompt list in the format:  
1. promptA  
2. promptB  
3. promptC  
...  
The first sentence of the output is "this is the list:".

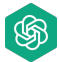

### ChatGPT Response:

This is the list:

1. A photo of a small cream pitcher with a glossy white finish.
2. An image of a vintage cream pitcher with delicate floral patterns.
3. A real photo of a large cream pitcher made of fine bone china.
4. A photography of a modern cream pitcher with a sleek silver handle.
5. An illustration of a cream pitcher in a vibrant shade of turquoise.
6. A photo of a small cream pitcher with a rustic, weathered appearance.
7. An image of a cream pitcher adorned with intricate gold filigree.
8. A real photo of a tall cream pitcher with a matte black finish.
9. A photography of a cream pitcher in a classic white color with a scalloped edge.
10. An illustration of a cream pitcher shaped like a whimsical cow.
11. A photo of a vintage cream pitcher with a charming polka dot design.
12. An image of a cream pitcher made of clear glass with a frosted bottom.
13. A real photo of a cream pitcher in a unique hourglass shape.
14. A photography of a cream pitcher with a playful print of colorful flowers.
15. An illustration of a cream pitcher with a hand-painted blue and white pattern.
16. A photo of a small cream pitcher made of delicate porcelain.
17. An image of a cream pitcher with a textured surface resembling tree bark.
18. A real photo of a cream pitcher in a vibrant shade of coral pink.
19. A photography of a cream pitcher with a gold-trimmed spout and handle.
20. An illustration of a cream pitcher shaped like a graceful swan.

Figure 3. Example of using ChatGPT to design prompts.



A photo of a copper tray with a hammered texture, in a white background

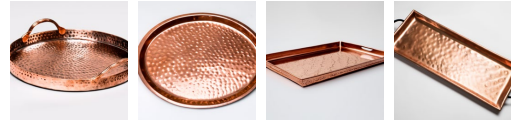

A real photo of a large tray made of clear acrylic material, in a white background

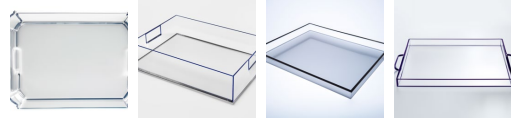

A photo of a large tray with vibrant floral designs, in a white background

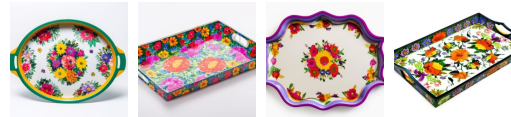

An image of a wooden tray with intricate carvings, in a white background

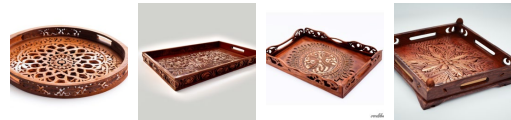

A photo of a small ceramic tray in a vibrant turquoise color, in a white background

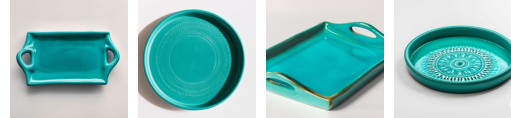

A photography of a ceramic tray with colorful geometric patterns, in a white background

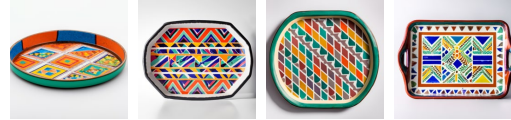

An illustration of a tray made of recycled materials, in a white background

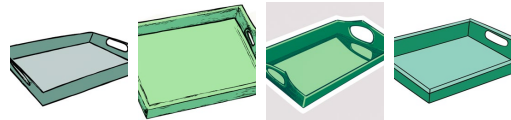

A photography of a small porcelain tray adorned with intricate blue and white designs, in a white background

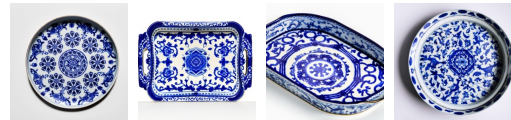

A photography of a tray made of bamboo with a natural brown color, in a white background

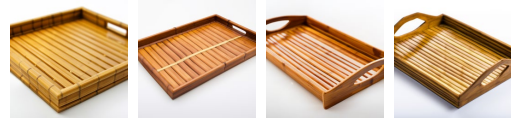

A real photo of a crystal tray with sparkling facets, in a white background

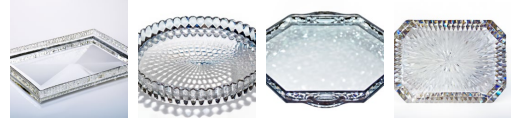

A photo of a large tray made of marble with white veins, in a white background

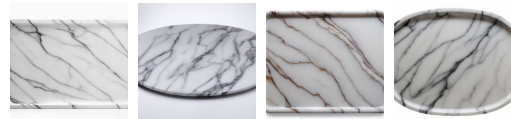

An illustration of a gold tray with a mirrored bottom, in a white background

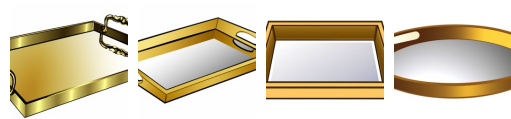

Figure 4. **Examples of ChatGPT designed prompts and corresponding generative images.** Images generated from ChatGPT designed prompts have diverse textures, styles, patterns, etc.

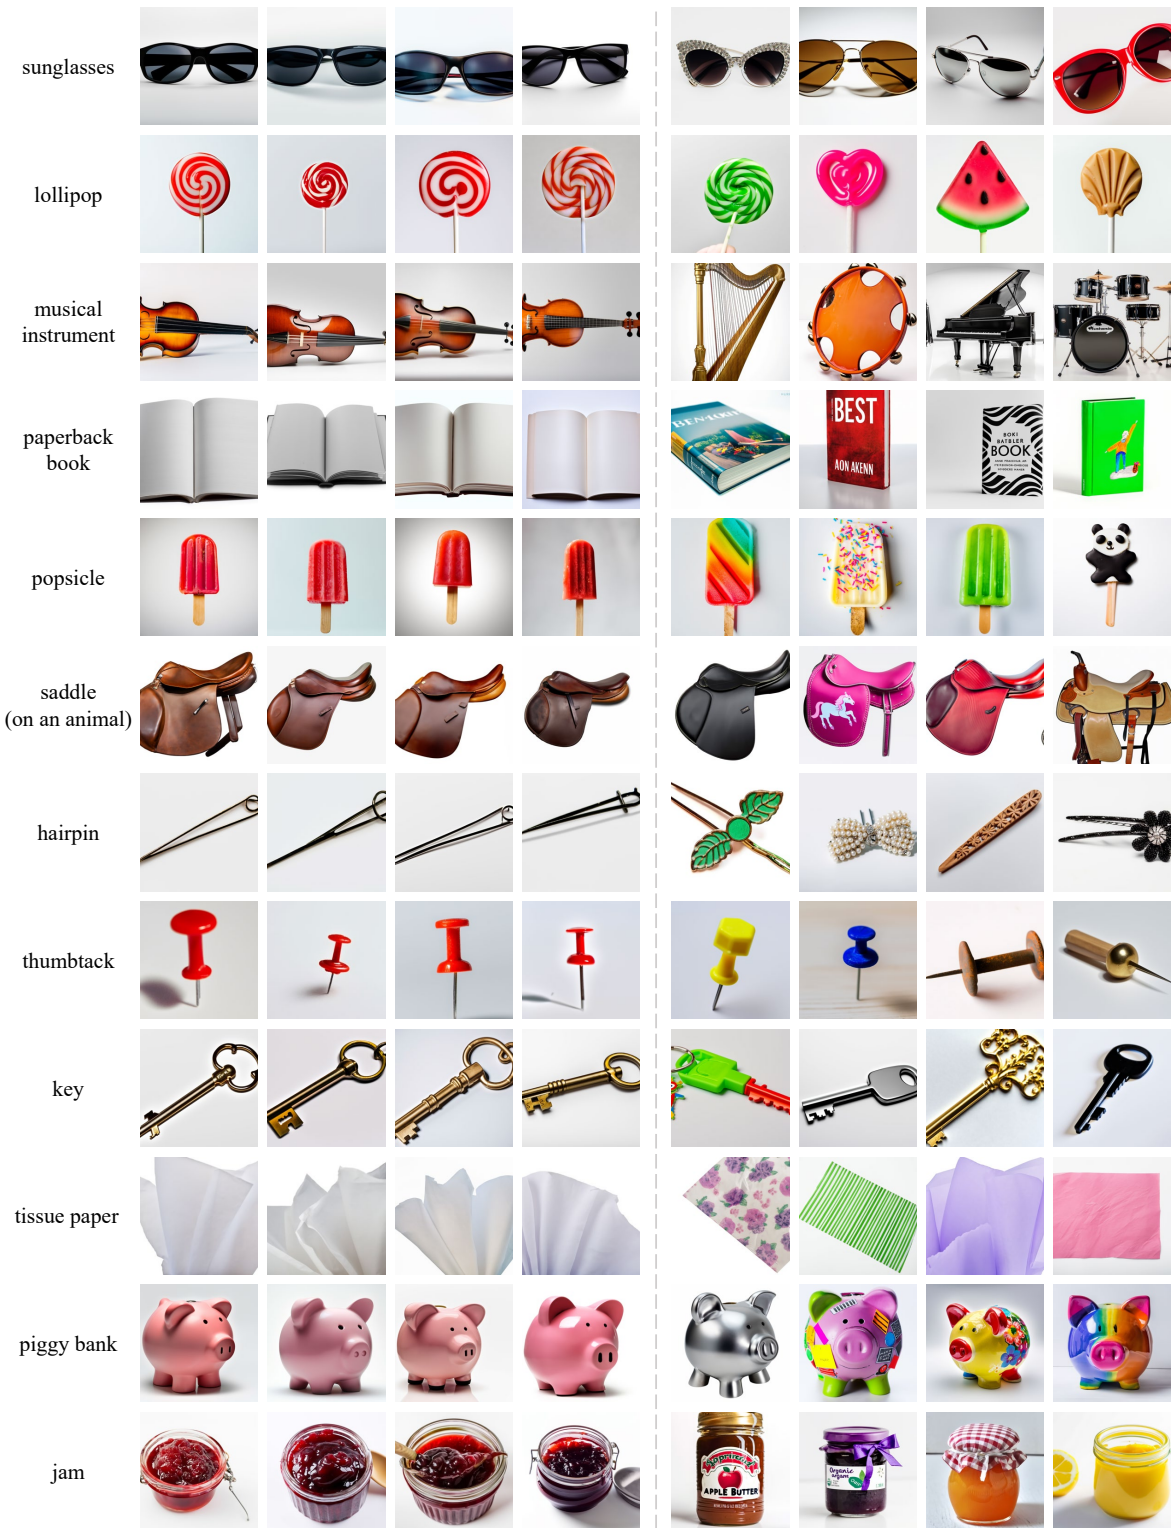

Images of manually designed prompts.

Images of ChatGPT designed prompts.

Figure 5. **Examples of generative data using different prompts.** By using prompts designed by ChatGPT, the diversity of generative images in terms of shapes, textures, etc. can be significantly improved.

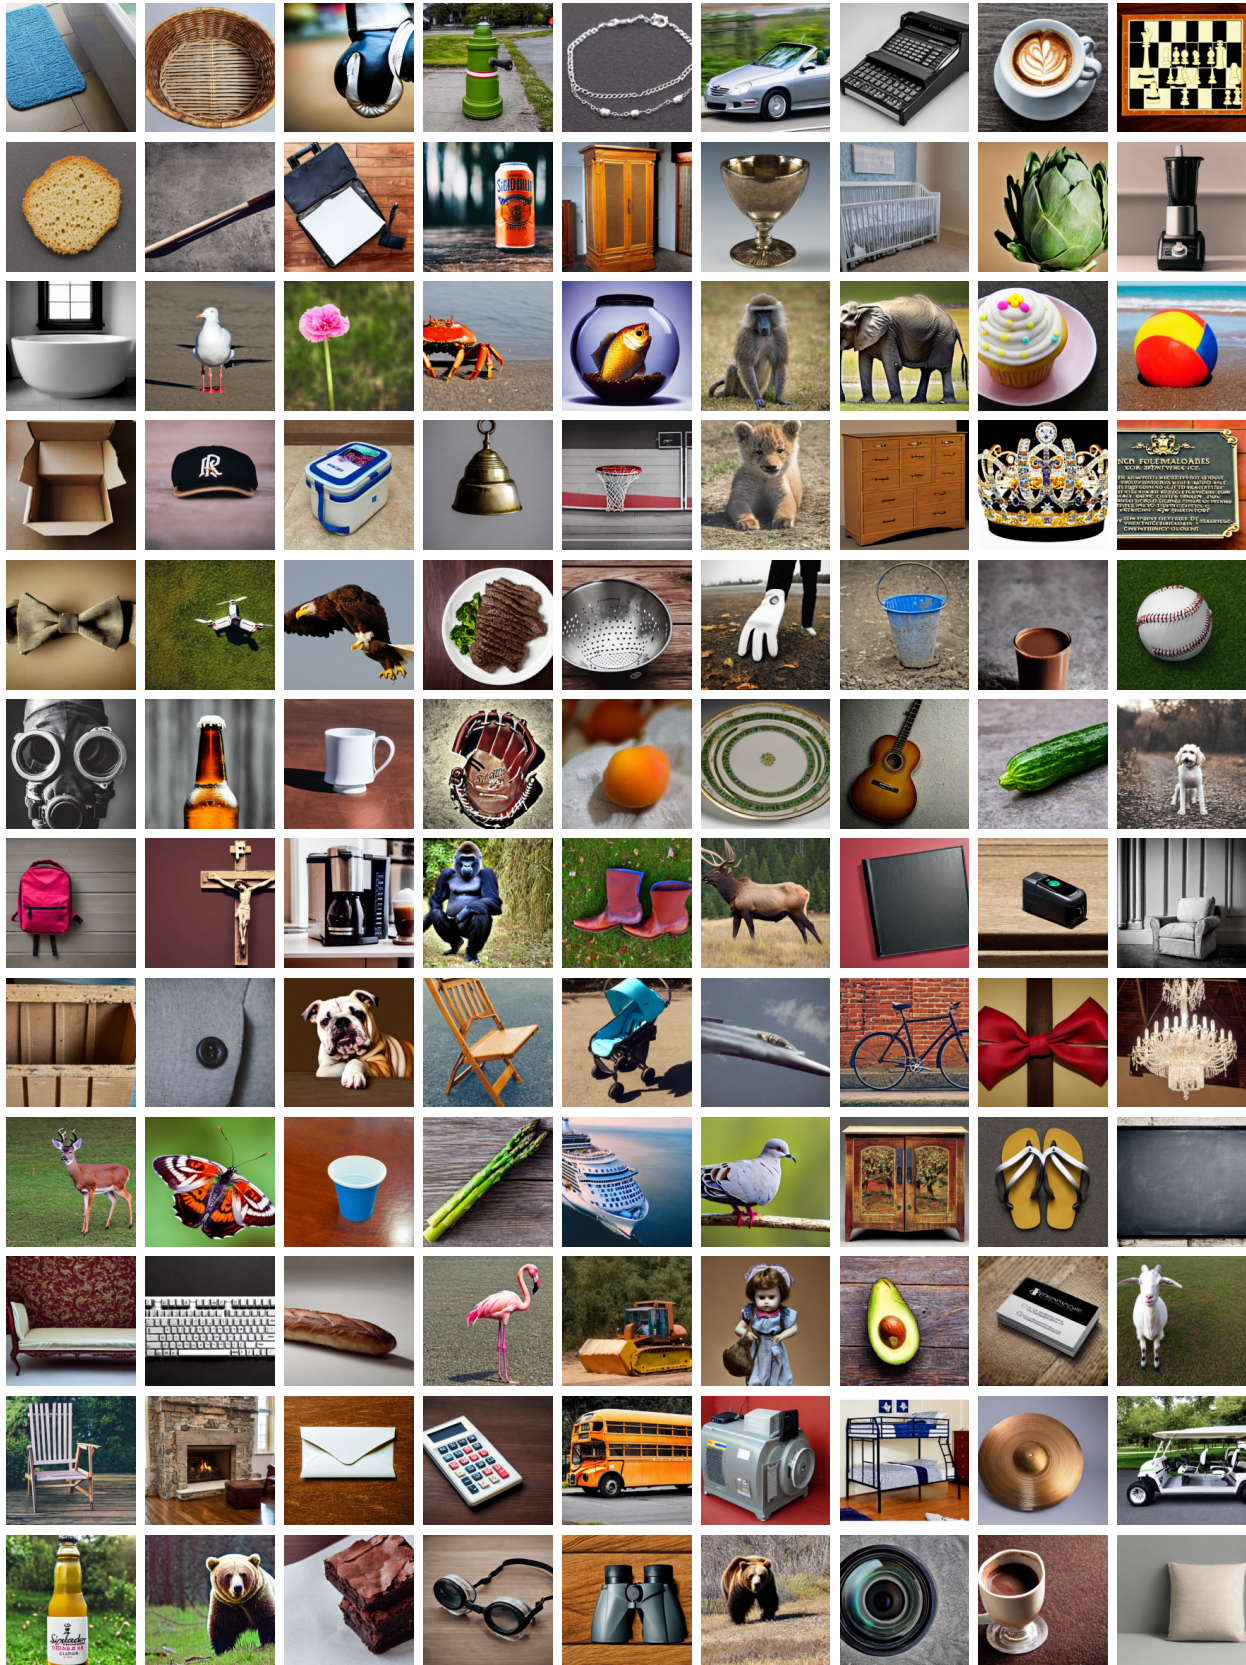

Figure 6. Examples from Stable Diffusion. The samples generated by different generative models vary, even within the same category.

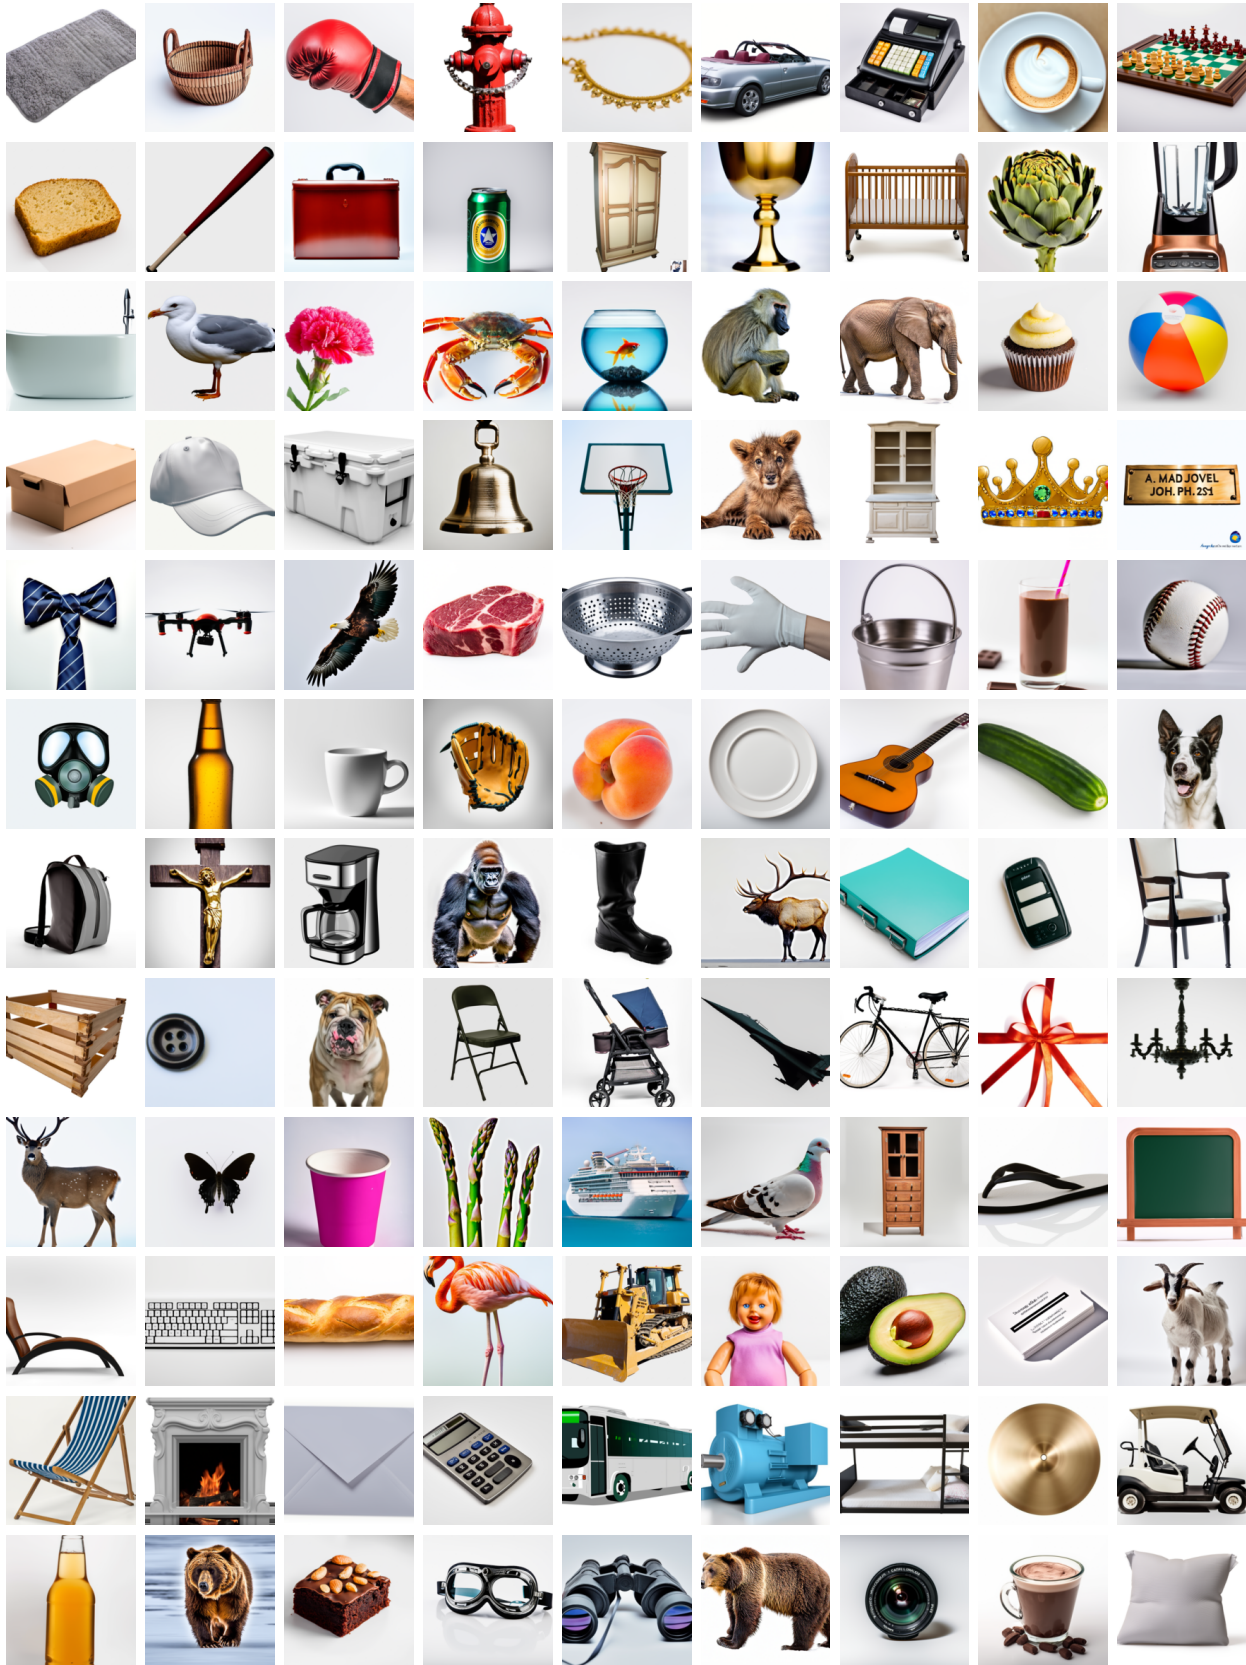

Figure 7. **Examples from DeepFloyd-IF.** The samples generated by different generative models vary, even within the same category.

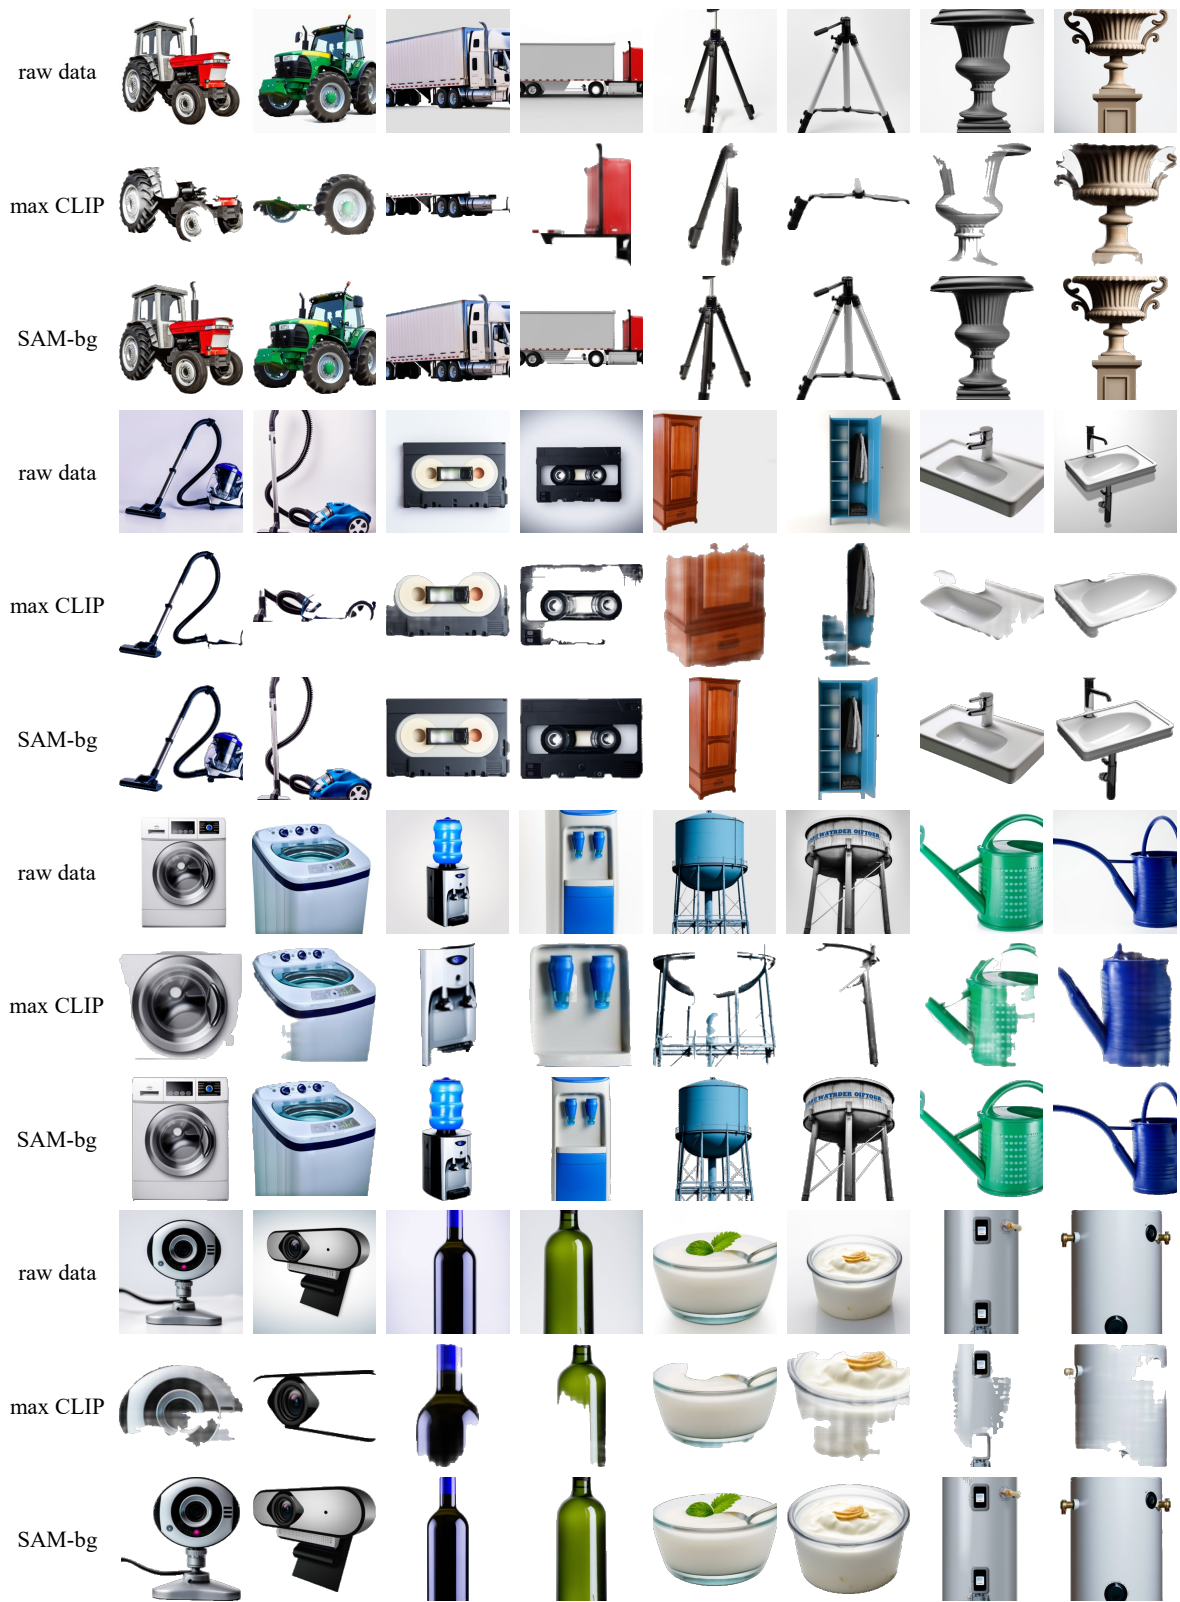

Figure 8. **Examples of different annotation strategies.** Masks generated by max CLIP tend to be incomplete, while our proposed SAM-bg is able to produce more refined and complete masks when processing images with multiple categories.

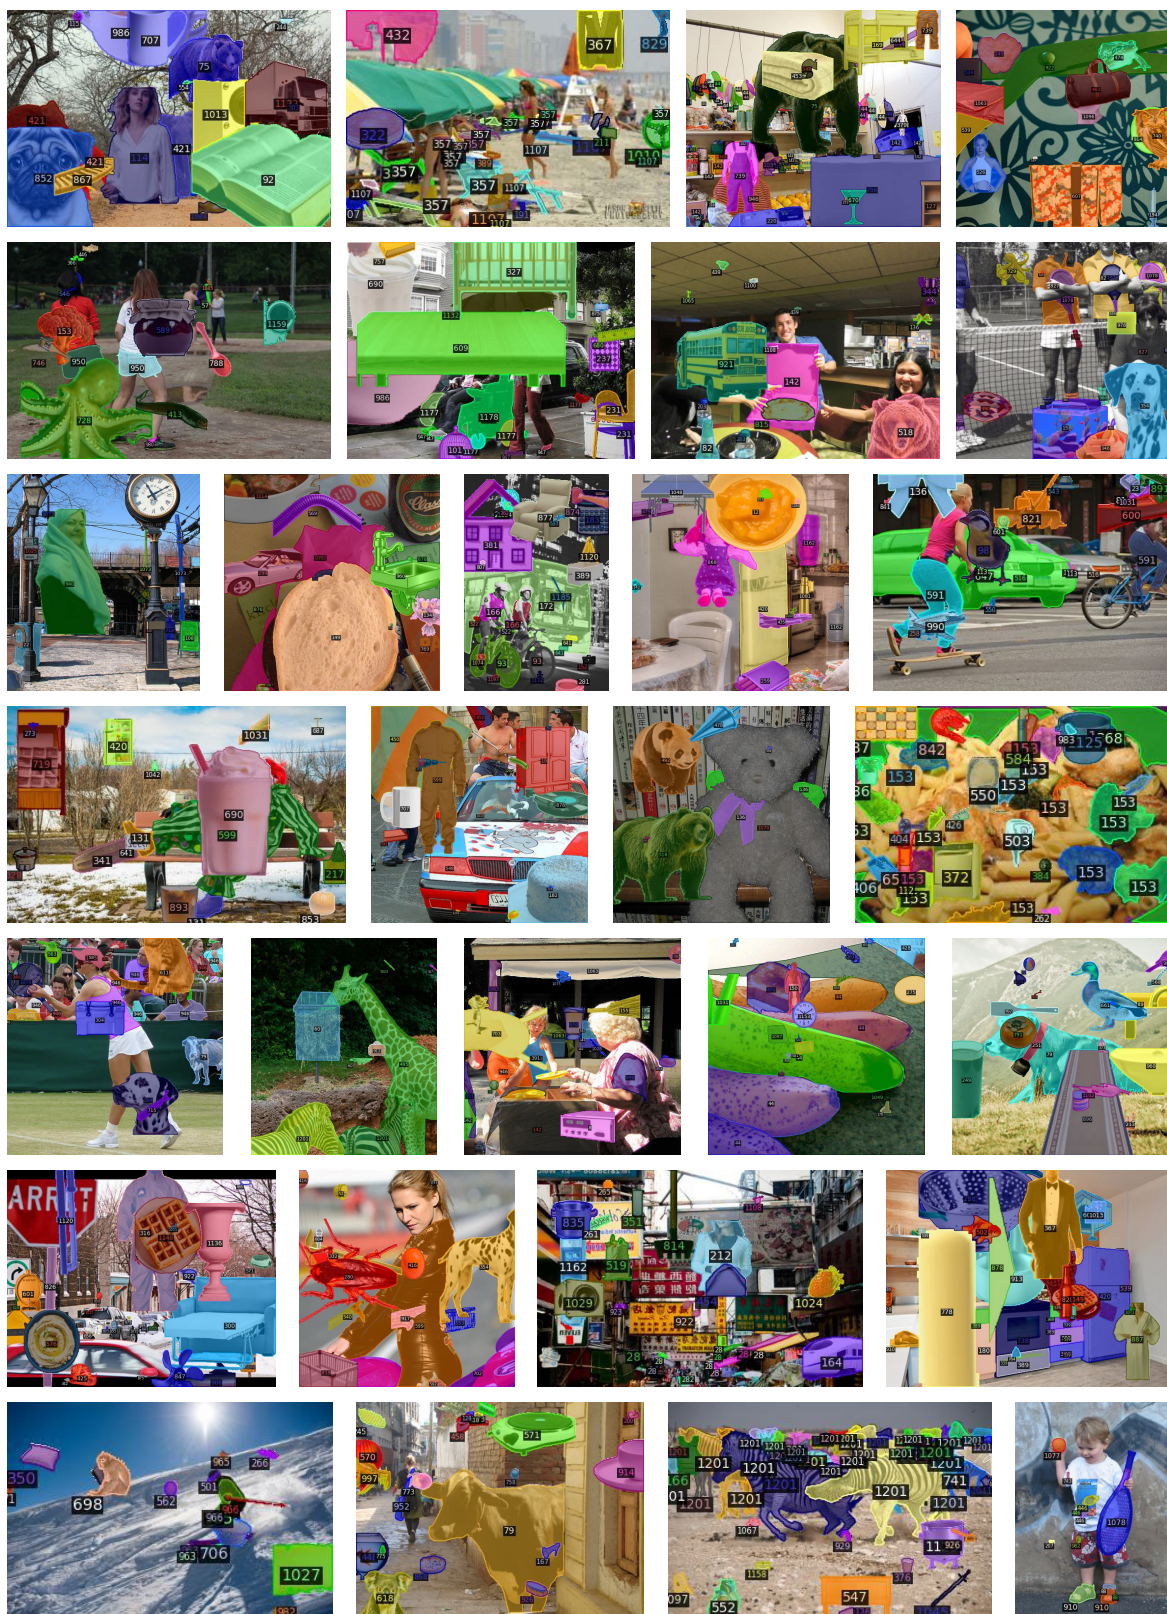

Figure 9. **Examples of augmented data.** The use of instance augmentation strategies helps alleviate the limitation in relatively simple scenes of generative data and improves the efficiency of model learning on the generative data.
